# Supplementary material for: Microcephaly-associated protein WDR62 shuttles from the Golgi apparatus to the spindle poles in human neural progenitors
Source: eLife journal article supplement (doi:10.7554/elife.81716), 2023-04-18

Figure 4 - figure supplement 1 (E)

|                       |   |   |   |   |   |
|-----------------------|---|---|---|---|---|
| Myc-hCDK5RAP2         | + | - | - | + | + |
| hWDR62-FLAG           | - | + | - | + | - |
| hWDR62*<br>D955A-FLAG | - | - | + | - | + |

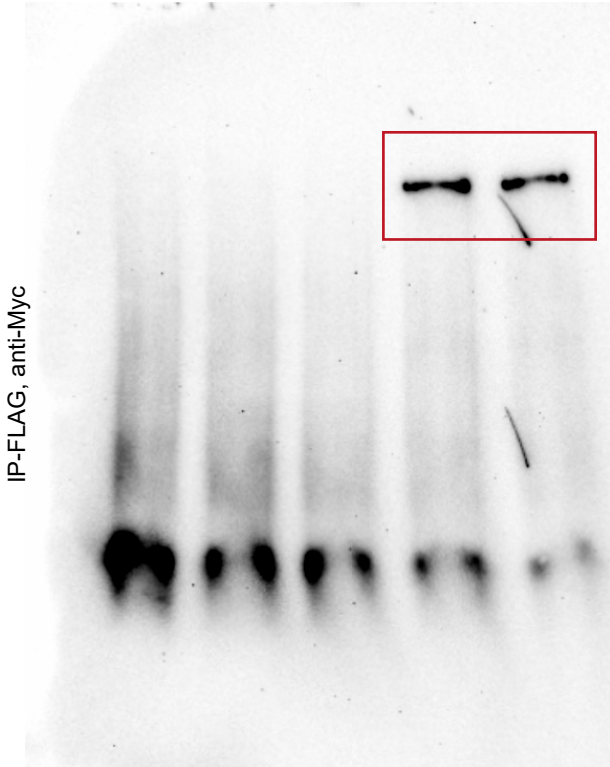

|                       |   |   |   |   |   |
|-----------------------|---|---|---|---|---|
| Myc-hCDK5RAP2         | + | - | - | + | + |
| hWDR62-FLAG           | - | + | - | + | - |
| hWDR62*<br>D955A-FLAG | - | - | + | - | + |

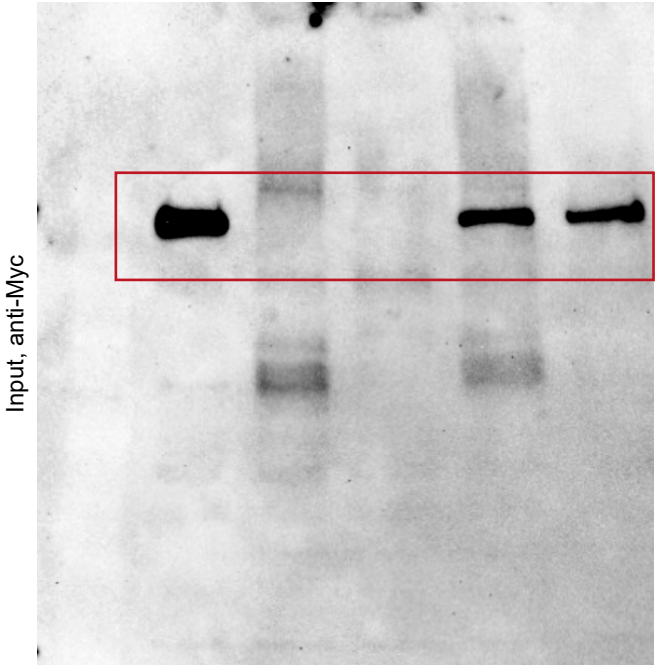

|                       |   |   |   |   |   |
|-----------------------|---|---|---|---|---|
| Myc-hCDK5RAP2         | + | - | - | + | + |
| hWDR62-FLAG           | - | + | - | + | - |
| hWDR62*<br>D955A-FLAG | - | - | + | - | + |

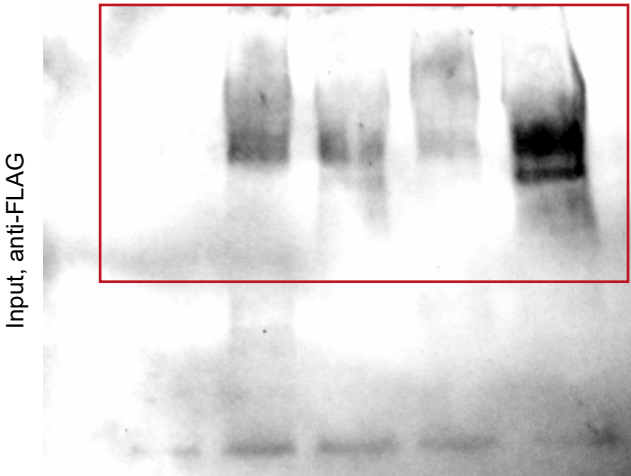

Supplement: fig3-figsupp1-data1 [file elife-81716-fig3-figsupp1-data1-v1.zip]
