# Supplementary material for: Microcephaly-associated protein WDR62 shuttles from the Golgi apparatus to the spindle poles in human neural progenitors
Source: eLife journal article supplement (doi:10.7554/elife.81716), 2023-04-18

Figure 4 - figure supplement 1 (F)

|                       |   |   |   |
|-----------------------|---|---|---|
| Myc-hAURKA            | + | + | + |
| hWDR62-FLAG           | - | + | - |
| hWDR62*<br>D955A-FLAG | - | - | + |

IP-FLAG, anti-Myc

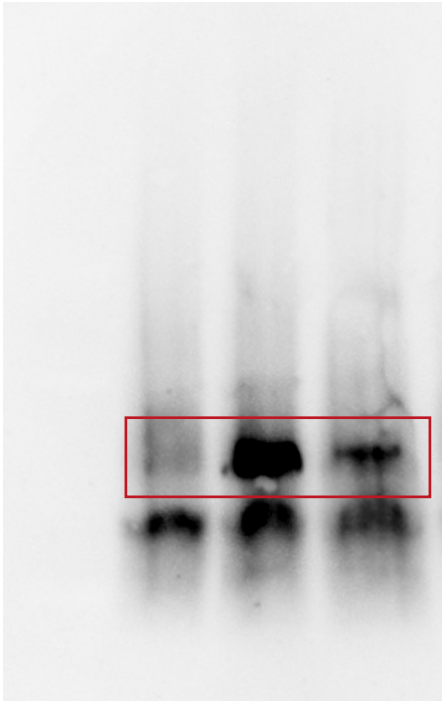

|                       |   |   |   |
|-----------------------|---|---|---|
| Myc-hAURKA            | + | + | + |
| hWDR62-FLAG           | - | + | - |
| hWDR62*<br>D955A-FLAG | - | - | + |

Input, anti-Myc

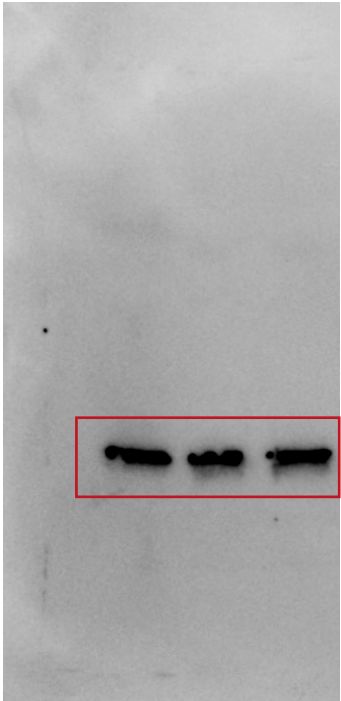

|                       |   |   |   |
|-----------------------|---|---|---|
| Myc-hAURKA            | + | + | + |
| hWDR62-FLAG           | - | + | - |
| hWDR62*<br>D955A-FLAG | - | - | + |

Input, anti-FLAG

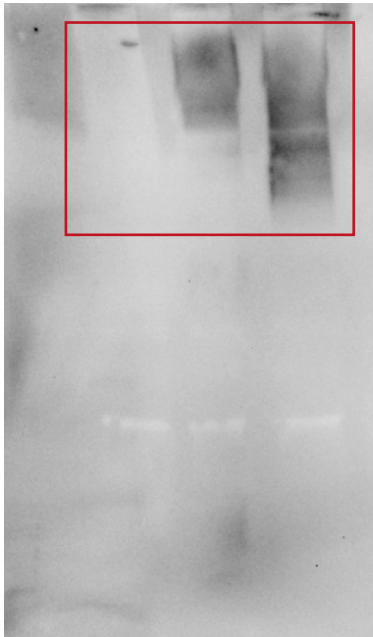

Supplement: fig3-figsupp1-data2 [file elife-81716-fig3-figsupp1-data2-v1.zip]
