# Supplementary figures and images for: Microcephaly-associated protein WDR62 shuttles from the Golgi apparatus to the spindle poles in human neural progenitors
Source: eLife journal article supplement (doi:10.7554/elife.81716), 2023-04-18

Figure 2 - figure supplement 1 (B)

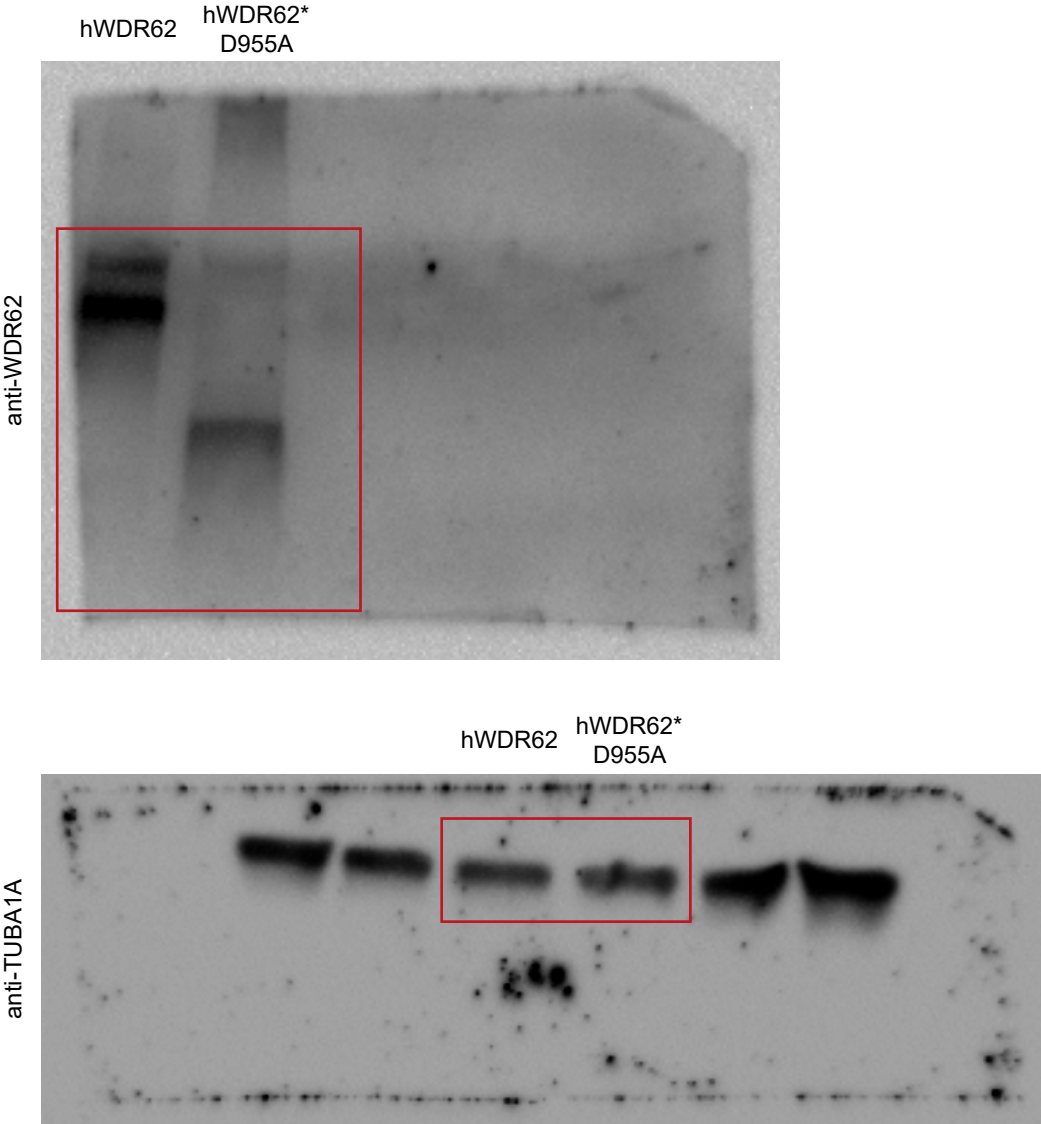

Supplement: fig2-figsupp2-data1 [file Figure 2_figure supplement 2_uncropped labelled.pdf › Figure 2-figure supplement 2-source data 1/Blots labelled/Figure 2_figure supplement 2_uncropped labelled.pdf]
